# Supplementary material for: RT-qPCR Diagnostics: The “Drosten” Sars-Cov-2 Assay Paradigm
Source: Preprints.org preprint supplement (doi:10.20944/preprints202107.0604.v2), 2021-08-03
Supplement: Supplementary file 1 [file supplementary]

## Sheet: Table S1
Publication	RT				qPCR
	Volume (µL)	Kit	Temperature (ºC)	Time (min)	F/R/Pr concentration (nM)	D temperature (ºC)	D time (sec)	A/P temperature (ºC)	A/P time (sec)	Instrument
Corman	25	SS3 1-step	55	10	600/800/100	95	15	58	30	LC480/ABI ViiA7
Vogels	?	Luna 1-step	55	10	500/500/250	95	10	55	30	BioRad CFX
Pillonel	?	?	?	?	?	?	?	?	?	ABI QS7
Nalla	25	AgPath-ID 1-step	48	10	600/800/100	95	15	60	45	ABI 7500
Jung	20	TaqPath 1-step	25/55	2/10	300/300/300	94	15	60	30	BioRad CFX

## Sheet: 2
	Takara
Assay	A	B	C	D	E	F
Cq1	32.5772	31.354	34.3989	30.5473	35.3494	34.2257
Cq2	33.0012	30.3	33.6817	30.5236	33.3744	35.3173
Average Cq	32.7892	30.827	34.0403	30.5355	34.3619	34.7715
SD	0.299857	0.74532	0.507087	0.0167778	1.39654	0.771868
	GSD Novaprime
Assay	A	B	C	D	E	F
Cq1	29.2652	27.1103	30.1502	27.886	28.7832	32.0924
Cq2	29.142	27.2036	29.831	27.4304	28.5465	30.775
Average Cq	29.2036	27.157	29.9906	27.6582	28.6648	31.4337
SD	0.087105	0.0660058	0.225708	0.322149	0.167412	0.931589
	Quanta
Assay	A	B	C	D	E	F
Cq1	29.8153	28.673	30.4329	29.2376	30.0895	30.6202
Cq2	30.0492	28.2983	30.7993	29.401	30.0831	31.024
Average Cq	29.9322	28.4857	30.6161	29.3193	30.0863	30.8221
SD	0.16543	0.264968	0.259082	0.115601	0.00455001	0.285536
	TaqPath
Assay	A	B	C	D	E	F
Cq1	27.936	26.3351	28.8323	26.6666	30.0064	28.8824
Cq2	27.7492	26.3563	29.0609	26.5376	30.7824	30.2083
Average Cq	27.8426	26.3457	28.9466	26.6021	30.3944	29.5454
SD	0.132078	0.0149638	0.161618	0.0912482	0.548729	0.937546
	NEB
Assay	A	B	C	D	E	F
Cq1	34.4764	31.1665	35.2676	32.5478	36.379	37.251
Cq2	34.4932	32.8069	34.8722	32.1468	35.4753	37.0088
Average Cq	34.4848	31.9867	35.0699	32.3473	35.9272	37.1299
SD	0.0119309	1.15995	0.279612	0.283576	0.639005	0.171313

## Sheet: 3
Novaprime
RT Temp (ºC)	A	B	C	D	E	F
50	25.4396	23.01	26.1429	23.2412	25.0651	N.D.
49.4	25.1295	22.844	26.0254	23.0998	24.5742	27.3205
48.3	25.534	23.094	26.1008	23.4222	24.7289	25.6202
46.3	25.4604	23.6012	26.3601	23.8748	24.9363	25.6532
43.9	25.8149	24.1787	26.5158	24.2047	25.1217	26.0221
42	25.8566	24.3468	27.2132	24.4944	25.2873	26.6223
40.6	26.5501	24.4829	27.5234	24.9197	25.579	26.7139
40	26.4948	24.7064	27.9599	25.2779	25.8273	26.7475
PCRBio
RT Temp (ºC)	A	B	D
50	26.44	25.44	25.18
49.4	26.91	25.2	25.18
48.3	26.86	24.76	25.03
46.3	26.43	24.34	24.85
43.9	26.92	24.74	24.87
42	26.96	24.99	25.5
40.6	27.37	25.04	25.17
40	27.63	25.05	25.6
Quanta Toughmix
RT Temp (ºC)	A	B	D
50	27.14	25.24	25.92
49.4	26.84	25.05	25.34
48.3	26.42	25.08	25.16
46.3	26.43	25.25	25.34
43.9	26.85	25.52	25.49
42	27.64	25.81	25.75
40.6	27.69	25.83	25.7
40	27.41	26.11	26.21

## Sheet: 4
Separate RT random primers + qPCR
Vilo +BL	A	B	C	D	E	F
Cq1	31.8592	30.4513	28.3646	27.8315	27.969	28.1387
Cq2	31.535	31.0977	28.1774	27.6429	27.3726	28.0947
Average Cq	30.39	29.98	27.54	27.16	27.07	27.43
SD	0.51	0.11	0.08	0.69	0.34	0.02
iScript +BL	A	B	C	D	E	F
Cq1	33.2971	33.1575	32.3696	32.0345	32.0106	32.9938
Cq2	33.669	33.6071	32.5735	32.3424	32.191	32.555
Average Cq	32.97	32.74	31.08	31.88	31.59	32.35
SD	0.3	0.24	1.28	0.11	0.18	0.33
A Vilo	RT1	RT2	RT3	RT4		A Vilo (rpt)	RT1	RT2	RT3	RT4			A iScript	RT1	RT2	RT3	RT4
Cq1	26.0969	27.0369	26.5962	27.1982		Cq1	26.1122	26.0509	25.6138	25.5104			Cq1	25.5604	25.0729	25.7446	24.4042
Cq2	26.2958	26.7211	26.4488	27.0939		Cq2	25.9102	25.8401	25.5708	25.4139			Cq2	25.3849	24.9546	25.5385	25.1023
Average	26.1964	26.879	26.5225	27.1461		Average	26.0112	25.9455	25.5923	25.4622			Average	25.4726	25.0138	25.6416	24.7532
SD	0.140612	0.223352	0.104218	0.0736913		SD	0.142851	0.149035	0.0303449	0.0682365			SD	0.12408	0.0836017	0.145707	0.49367
B Vilo	RT1	RT2	RT3	RT4		B Vilo (rpt)	RT1	RT2	RT3	RT4			B iScript	RT1	RT2	RT3	RT4
Cq1	25.8966	26.0758	26.0848	26.9775		Cq1	25.5527	25.3359	25.3815	25.9635			Cq1	24.2999	24.3784	24.1288	24.3352
Cq2	25.8216	26.1087	25.9675	26.8242		Cq2	26.3719	25.3208	25.1063	25.8886			Cq2	24.2447	24.1545	24.4555	24.52
Average	25.8591	26.0923	26.0261	26.9008		Average	25.9623	25.3283	25.2439	25.9261			Average	24.2723	24.2665	24.2921	24.4276
SD	0.0529982	0.0232701	0.0829556	0.108408		SD	0.579244	0.0106863	0.19458	0.0529637			SD	0.0390191	0.158323	0.231003	0.130683

## Sheet: 5
Threshold method				Regression method
Temperature (ºC)	A	D		Temperature (ºC)	A	D
60	15.9293	15.7322		60	13.9223	14.0454
59.1	15.8458	15.585		59.1	13.873	13.9558
57.5	15.7802	15.7379		57.5	13.8748	14.009
54.5	15.8813	15.7757		54.5	13.9082	14.0425
50.8	15.9621	15.8497		50.8	13.9531	14.0992
48	16.2455	16.0887		48	14.3068	14.1594
46	15.8984	15.9357		46	13.9433	14.1098
45	16.1721	16.0514		45	13.8161	14.1164
Temperature (ºC)	A	D		Temperature (ºC)	A	D
60	22.5537	22.7156		60	20.684	20.9569
59.1	22.2114	22.4502		59.1	20.3068	20.9208
57.5	22.0527	22.4374		57.5	20.2059	20.9439
54.5	21.93	22.704		54.5	20.2649	20.9621
50.8	21.9831	22.5955		50.8	20.235	21.0066
48	22.0628	22.6819		48	20.2905	20.9971
46	21.9179	22.6373		46	20.3231	21.0234
45	22.4346	22.8173		45	20.4164	21.0511

## Sheet: 6
PrimerDesign		58ºC	60ºC	62ºC	64ºC
A	Cq1	24.27	24.4271	25.7444	29.1688
	Cq2	24.1399	24.7829	25.7316	28.184
	Average Cq	24.205	24.605	25.738	28.6764
	SD	0.0920254	0.251607	0.00902212	0.696373
D	Cq1	24.2018	23.8516	23.5232	24.029
	Cq2	23.8691	23.6773	23.7623	24.7422
	Average Cq	24.0354	23.7644	23.6428	24.3856
	SD	0.235245	0.123215	0.169063	0.504292
ThermoFisher		58ºC	60ºC	62ºC	64ºC
A	Cq1	26.7212	29.5513	32.0414	N/A
	Cq2	26.9223	29.7533	32.0755	N/A
	Average Cq	26.8217	29.6523	32.0584	#DIV/0!
	SD	0.142248	0.142828	0.0241592	#DIV/0!
D	Cq1	22.095	24.7388	28.4188	N/A
	Cq2	21.0823	24.907	27.8707	N/A
	Average Cq	21.5886	24.8229	28.1448	#DIV/0!
	SD	0.716042	0.118902	0.387575	#DIV/0!
KAPA		58ºC	60ºC	62ºC	64ºC
A	Cq1	22.6528	24.0079	26.5027	33.3427
	Cq2	22.7002	23.8194	26.5155	32.8516
	Average Cq	22.6765	23.9137	26.5091	33.0972
	SD	0.0335524	0.133261	0.00909904	0.34725
D	Cq1	23.5575	22.4384	23.2979	25.4519
	Cq2	23.236	22.4682	23.1159	25.5668
	Average Cq	23.3968	22.4533	23.2069	25.5093
	SD	0.227313	0.0211154	0.128693	0.0812153
Quanta		58ºC	60ºC	62ºC	64ºC
A	Cq1	23.62	24.1007	26.2848	31.2374
	Cq2	23.2872	24.0016	26.3238	30.7593
	Average Cq	23.4536	24.0511	26.3043	30.9984
	SD	0.235296	0.0700799	0.0276019	0.338007
D	Cq1	23.5972	23.3182	23.3956	25.0705
	Cq2	23.3259	23.5697	23.5031	24.924
	Average Cq	23.4615	23.444	23.4493	24.9973
	SD	0.191846	0.177857	0.0760471	0.103592

## Sheet: 7
	PCRBio 1			PCRBio 2			PCRBio 3
	CoV2-ID	ALT-P1	P1	CoV2-ID	ALT-P1	P1	CoV2-ID	ALT-P1	P1
Cq1	21.5981	26.6391	27.1477	21.4191	26.1315	27.2546	21.5236	26.9993	27.3547
Cq2	21.4184	26.0223	26.3609	21.2915	25.8061	26.6935	21.3172	27.4831	27.0214
Average	21.5083	26.3307	26.7543	21.3553	25.9688	26.974	21.4204	27.2412	27.188
SD	0.127049	0.436095	0.556298	0.0902002	0.230115	0.396762	0.145946	0.342103	0.235666
	Ultrascript		Vilo
	ALT-P1	P1	ALT-P1	P1
Cq1	26.9043	26.9869	27.2965	26.2638
Cq2	26.7904	26.979	27.036	26.7729
Average	26.8473	26.9829	27.1663	26.5184
SD	0.0805115	0.00563692	0.184214	0.359966

## Sheet: 8
PrimeScript 3	A		C		D
Primer concentration	1x	2x	1x	2x	1x	2x
Cq1	31.4304	27.7642	29.1367	25.7614	26.3711	25.8503
Cq2	30.915	28.1899	27.3795	25.2709	27.0852	25.5176
Average Cq	31.1727	27.9771	28.2581	25.5161	26.7282	25.6839
SD	0.364463	0.301002	1.24254	0.346829	0.504936	0.235219
Cq 1x vs 2x		-3.19561		-2.742		-1.04424
SD		0.472689		1.29003		0.557035
PCRBio	A		C		D
Primer concentration	1x	2x	1x	2x	1x	2x
Cq1	30.3933	28.2665	27.5376	25.9238	25.9425	26.0416
Cq2	30.5464	27.9654	26.9447	26.4879	26.0386	28.1141
Average Cq	30.4699	28.116	27.2412	26.2058	25.9906	27.0779
SD	0.108234	0.21287	0.419224	0.398878	0.0679228	1.46547
Cq 1x vs 2x		-2.35389		-1.03535		1.08731
		0.238806		0.578664		1.46704

## Sheet: 9
	TaqPath	GSD	Quanta	PrimeScript	Luna	Biorad	Sigma	PCRBio	Sansure
Cq1	23.5277	23.2406	24.2883	24.4055	24.8971	25.4908	26.3795	24.3877	25.324
Cq2	23.0016	23.2456	23.9992	23.9689	24.9703	25.3516	26.3649	24.0665	25.1893
Cq3	22.812	23.1671	24.0125	24.3632	24.5858	24.8417	26.2059	24.1865	25.1877
Cq4	23.8813	23.8671	25.1927	24.6751	24.8004	24.8529	26.6345	24.0519	25.0534
Cq5	23.3474	23.5296	24.6959	25.9135	25.4924	25.6455	27.0423	24.6886	25.2398
Average	23.314	23.41	24.4377	24.6652	24.9492	25.2365	26.5254	24.2762	25.1988
Min	22.812	23.1671	23.9992	23.9689	24.5858	24.8417	26.2059	24.0519	25.0534
Max	23.8813	23.8671	25.1927	25.9135	25.4924	25.6455	27.0423	24.6886	25.324
∆Cq	1.06936	0.699935	1.19347	1.94467	0.906645	0.803773	0.83637	0.636733	0.270538
Fold-difference	2.0985	1.62443	2.28702	3.84948	1.87468	1.74566	1.78555	1.5548	1.20626
	Overall
Average	24.6681
Min	22.812
Max	27.0423
∆Cq	4.23033
Fold-difference	18.7697
